# Supplementary material for: Highly Efficient and Selective Oxidation of Benzyl Alcohol by WO42− Catalyst Immobilized by a Phosphonium-Containing Porous Aromatic Framework
Source: MDPI journal article supplement (doi:10.3390/catal13091309), 2023-09-20

## Supporting Information

### Highly Efficient and Selective Oxidation of Benzyl Alcohol by $\text{WO}_4^{2-}$ Catalyst Immobilized by a Phosphonium-Containing Porous Aromatic Framework

Bingxin You <sup>1</sup>, Zeliang Cheng <sup>2</sup>, Yuyang Tian <sup>2</sup>, Shaolei Wang <sup>2,\*</sup> and Baolin Wang <sup>2,\*</sup>

<sup>1</sup> Center of Disease Immunity and Intervention, College of Medicine, Lishui University, Lishui 323000, China; youbx634@nenu.edu.cn

<sup>2</sup> Key Laboratory of Polyoxometalate and Reticular Material Chemistry of the Ministry of Education, Faculty of Chemistry, Northeast Normal University, Changchun 130024, China; chengzl968@nenu.edu.cn (Z.C.); tianyy100@nenu.edu.cn (Y.T.)

\* Correspondence: wangsl030@nenu.edu.cn (S.W.); wangbl296@nenu.edu.cn (B.W.)

## Characterization details

Fourier transform infrared spectroscopy (FT-IR) was performed on a Nicolet IS50 FT-IR spectrometer (Thermo Scientific, Waltham, MA, USA), and PAF pellets were prepared by adding KBr. The  $^{13}\text{C}$  and  $^{31}\text{P}$  CP/MAS solid-state NMR spectra of PAFs were measured using a Bruker Advance III model 400 MHz NMR spectrometer (Bruker, Karlsruhe, Germany) at a MAS rate of 5 kHz. The morphology of the PAFs was characterized using a field emission scanning electron microscope (FE-SEM, SU-8010, Hitachi, Tokyo, Japan ). Transmission electron microscopy (TEM) was performed using a JEOL JEM-2100PLUS TEM (Tokyo, Japan) at an acceleration voltage of 200 kV, and samples were prepared by dropping a suspension of PAFs suspended in ethanol onto the microgrid. PXRD measurements were carried out on a Rigaku Smart-Lab X-ray diffractometer (Tokyo, Japan) with Cu-K $\alpha$  radiation (40 kV, 30 mA,  $\lambda = 1.5418 \text{ \AA}$ ) and a scanning step of  $0.01^\circ$ . The elemental analysis (for P and W) was performed using an inductively coupled plasma atomic emission spectrometer (ICP-AES) on a LEEMAN Prodigy (Hudson, NH, USA). Thermogravimetric analysis (TGA) was performed using a METTLER-TOLEDO TGA/DSC 3+ analyzer (Greifensee, Switzerland) under an air atmosphere at a heating rate of  $10^\circ\text{C min}^{-1}$ . A Quantachrome Autosorb-iQ2 analyzer (Boynton Beach, FL, USA) was used to analyze the specific surface area and pore structure with  $\text{N}_2$  as the probe molecule at 77 K. The water contact angle was detected using a CA-100C&D contact angle meter. Before the test, the samples were degassed at  $100^\circ\text{C}$  for 10 h. Gas chromatography mass spectrometry (GC-MS) analysis was employed for determining the catalytic reaction products using a Thermo Scientific Trace 1310-ISQ 7000 system (Waltham, MA, USA). Ultra-pure helium was used as the carrier gas, and the temperatures for the injection port and detector were both  $250^\circ\text{C}$ .

## Chemicals

All chemicals used in the experiments were of analytical grade and were used without further purification unless otherwise specified. All (dehydrated) solvents, dichloromethane (DCM), tetrahydrofuran (THF), and *N,N*-dimethylformamide (DMF) were purchased from Beijing InnoChem Science & Technology Co., Ltd (Beijing, China). All chemicals, 4,4'-dibromobiphenyl, phosphorus trichloride (PCl<sub>3</sub>), 2.50 M *n*-butyllithium (2.50 M *n*-BuLi), iodomethane (CH<sub>3</sub>I), sodium tungstate dihydrate (Na<sub>2</sub>WO<sub>4</sub> · 2H<sub>2</sub>O), benzyl alcohol and their derivatives, were purchased from Beijing InnoChem Science & Technology Co., Ltd.; Bis(1,5-cyclooctadiene)nickel(0) [Ni(cod)<sub>2</sub>], 1,5-cyclooctadiene (cod), and 2,2'-bipyridine were purchased from TCI Shanghai; 30% hydrogen peroxide (30% H<sub>2</sub>O<sub>2</sub>), sodium hydrogen sulfate (NaHSO<sub>4</sub>), tartaric acid, and *p*-toluenesulfonic acid (TsOH) were purchased from local drug suppliers.

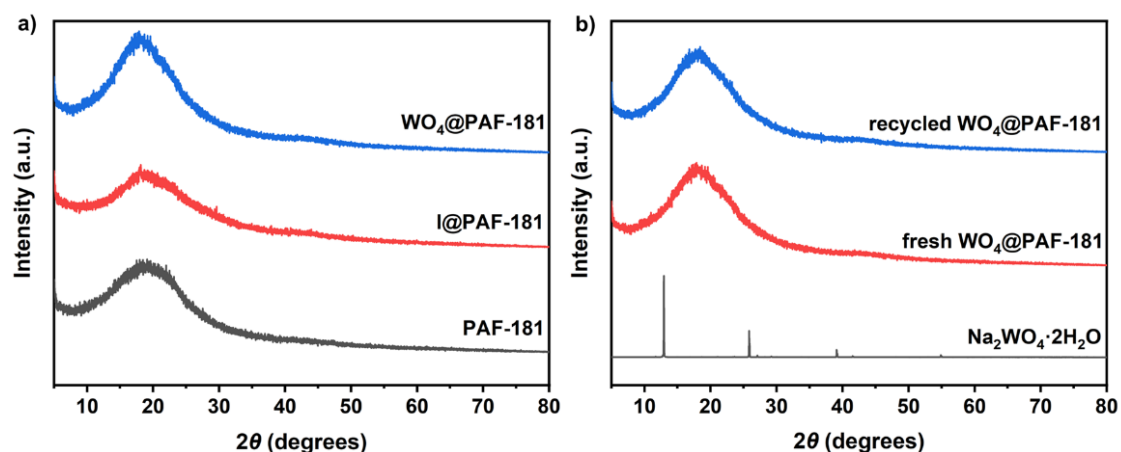

**Figure S1.** Experimental PXRD patterns of PAF-181, I@PAF-181, and  $\text{WO}_4\text{@PAF-181}$  (a);  $\text{Na}_2\text{WO}_4 \cdot 2\text{H}_2\text{O}$ , fresh  $\text{WO}_4\text{@PAF-181}$ , and recycled  $\text{WO}_4\text{@PAF-181}$  (b).

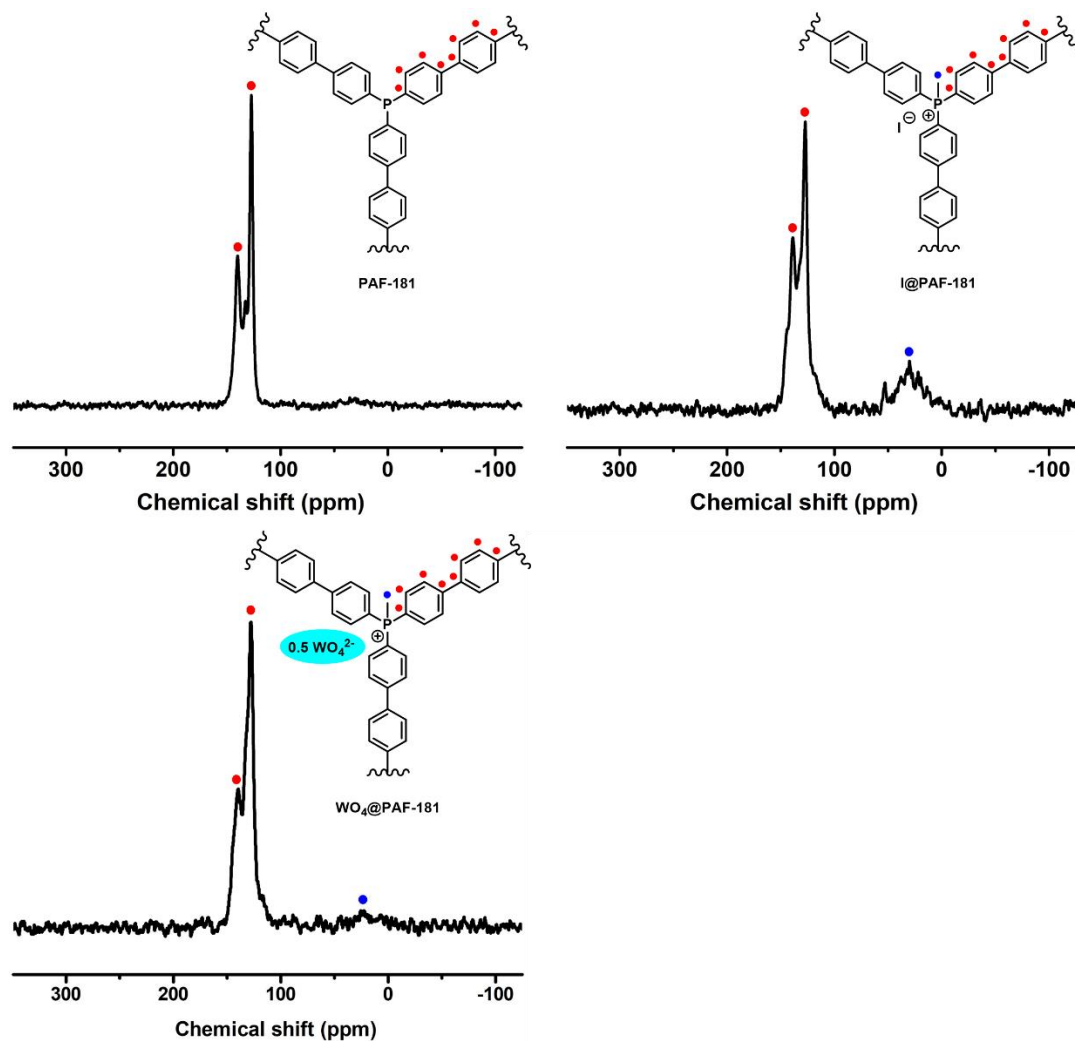

**Figure S2.**  $^{13}\text{C}$  CP/MAS solid-state NMR spectra of PAF-181, I@PAF-181, and  $\text{WO}_4\text{@PAF-181}$ .

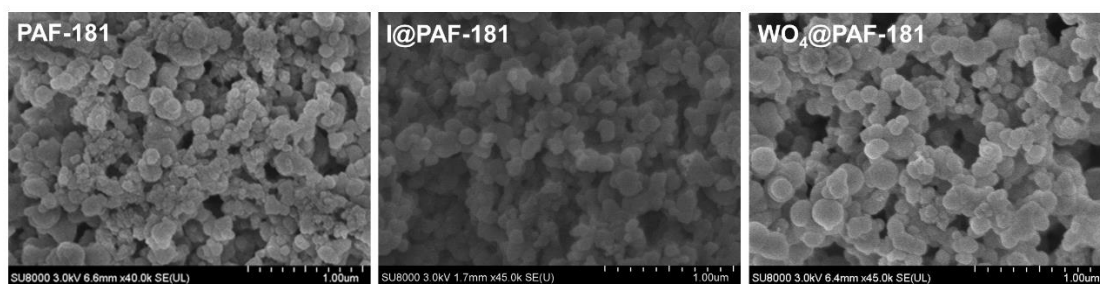

**Figure S3.** SEM images of PAF-181, I@PAF-181, and WO<sub>4</sub>@PAF-181.

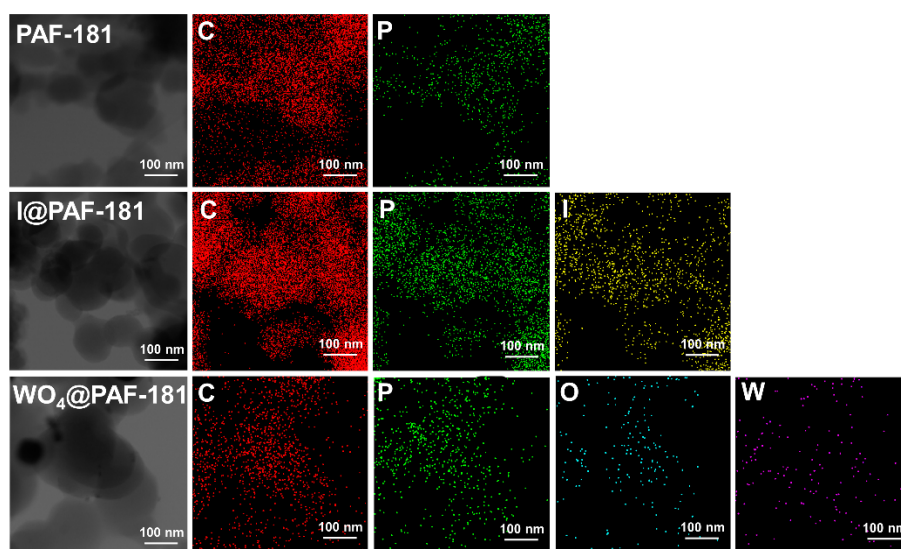

**Figure S4.** TEM-EDX mapping images of PAF-181, I@PAF-181, and WO<sub>4</sub>@PAF-181.

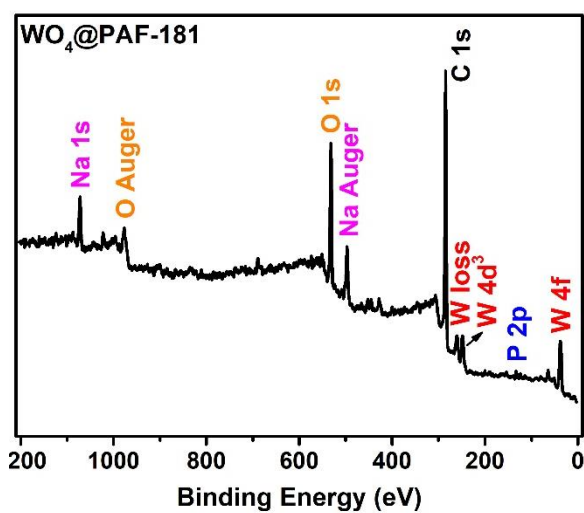

**Figure S5.** XPS survey scan of WO<sub>4</sub>@PAF-181.

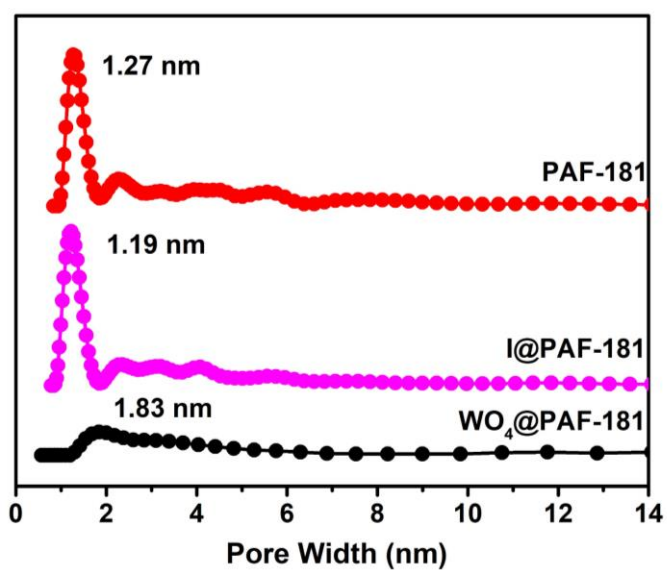

**Figure S6.** Pore size distributions of PAF-181, I@PAF-181, and WO<sub>4</sub>@PAF-181.

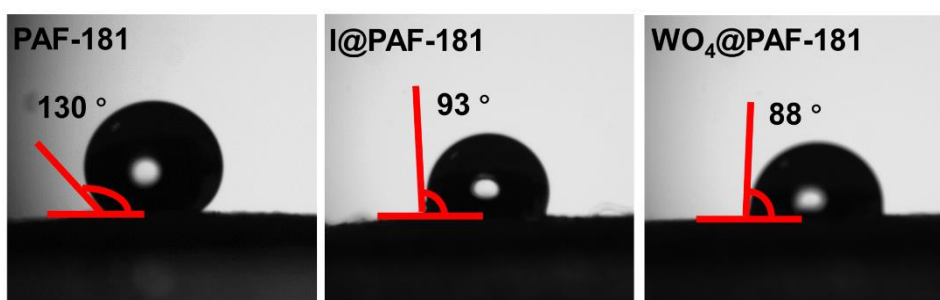

**Figure S7.** The water contact angles of PAF-181, I@PAF-181, and WO<sub>4</sub>@PAF-181.

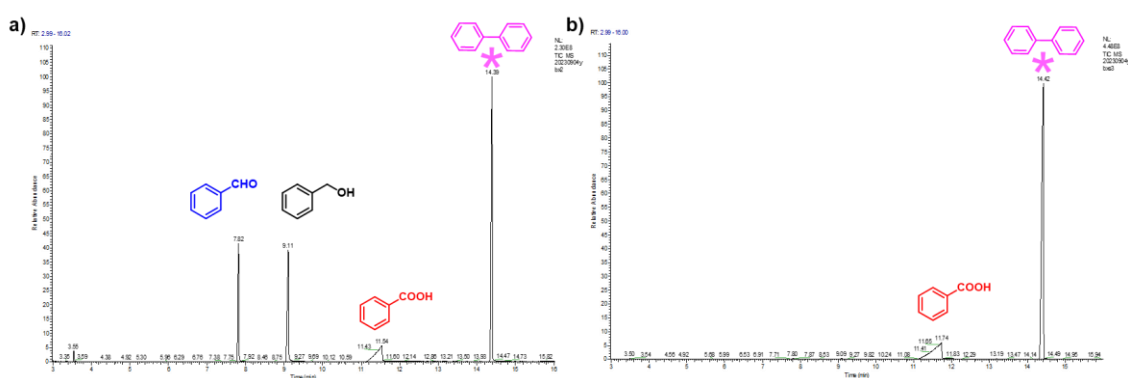

**Figure S8.** GC spectrum of the standard mixed solution of ethyl acetate in equimolar amounts of benzyl alcohol, benzaldehyde, benzoic acid, and biphenyl (internal standard) (a); GC spectrum for the optimal reaction conditions (b).

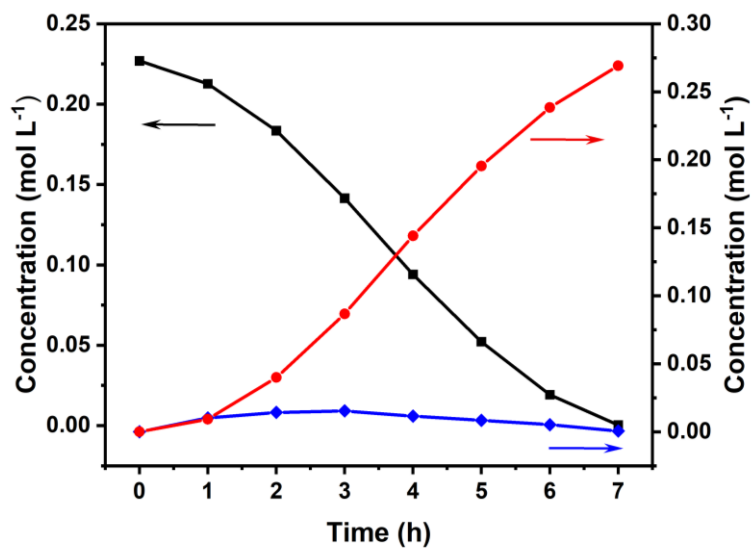

**Figure S9.** Plot of unconverted amount of benzyl alcohol and yield of benzaldehyde and benzoic acid vs. time during the oxidation of benzyl alcohol under optimal reaction conditions.

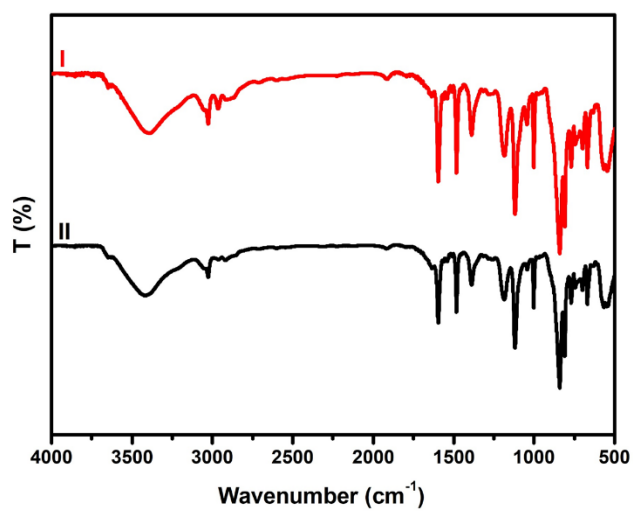

**Figure S10.** FT-IR spectra of fresh  $\text{WO}_4\text{@PAF-184}$  (I) and recycled  $\text{WO}_4\text{@PAF-184}$  (II).

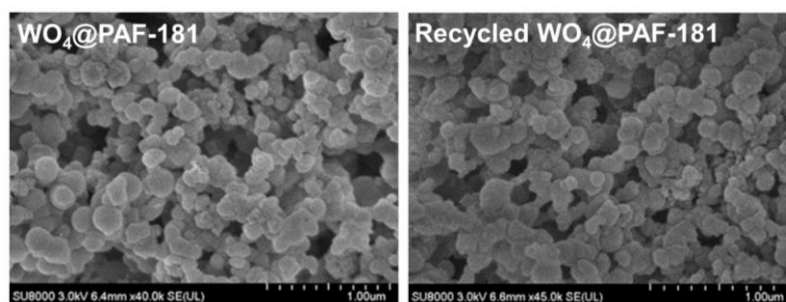

**Figure S11.** SEM images of fresh WO<sub>4</sub>@PAF-181 and recycled WO<sub>4</sub>@PAF-181.

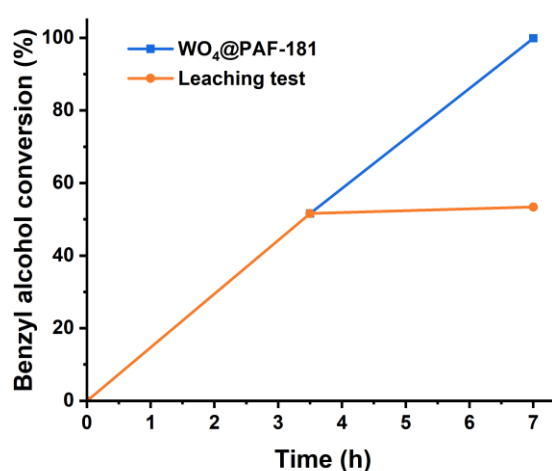

**Figure S12.** Plot of benzyl alcohol conversion vs. time for the oxidation of benzyl alcohol, under the reaction conditions of entry 11, Table 1, in the presence of WO<sub>4</sub>@PAF-181 (blue curve) and after filtering off the catalyst WO<sub>4</sub>@PAF-181 after 3.5 h reaction time (orange curve).

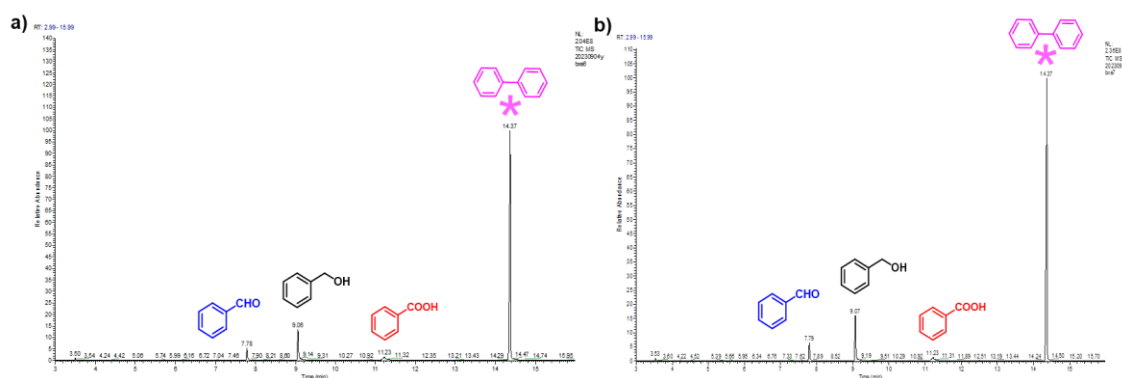

**Figure S13.** GC spectra of the filtrate at 3.5 h with WO<sub>4</sub>@PAF-181 (a) and at 7 h without WO<sub>4</sub>@PAF-181 (b) during the hot filtration test.

**Table S1.** ICP-AES test results for the P and W content of PAF-181, fresh WO<sub>4</sub>@PAF-181, recycled WO<sub>4</sub>@PAF-181 (red font), and the filtrate after filtering off the catalyst WO<sub>4</sub>@PAF-181 during the hot filtration test.

|   | PAF-181 | WO <sub>4</sub> @PAF-181 | WO <sub>4</sub> @PAF-181 | filtrate |
|---|---------|--------------------------|--------------------------|----------|
| P | 5.8 wt% | 4.1 wt%                  | 4.0 wt%                  | -        |
| W | -       | 14.1 wt%                 | 13.5 wt%                 | 0 wt%    |

**Table S2.** Characteristics of pores in PAF-181, I@PAF-181, and WO<sub>4</sub>@PAF-181 (calculated from their N<sub>2</sub> adsorption–desorption isotherms at 77 K using quenched solid density functional theory).

|                                               | PAF-181 | I@-PAF-181 | WO <sub>4</sub> @PAF-181 |
|-----------------------------------------------|---------|------------|--------------------------|
| BET specific surface area (m <sup>2</sup> /g) | 1029    | 579        | 45                       |
| micropore area (m <sup>2</sup> /g)            | 660     | 286        | 6                        |
| external surface area (m <sup>2</sup> /g)     | 369     | 293        | 39                       |
| total pore volume (cc/g)                      | 0.88    | 0.51       | 0.27                     |
| micropore volume (cc/g)                       | 0.29    | 0.13       | 0.01                     |
| pore volume (cc/g)                            | 0.73    | 0.44       | 0.11                     |
| mean pore diameter (nm)                       | 3.44    | 3.54       | 24.1                     |
| main pore width (nm)                          | 1.27    | 1.19       | 1.83                     |

# NMR Spectra

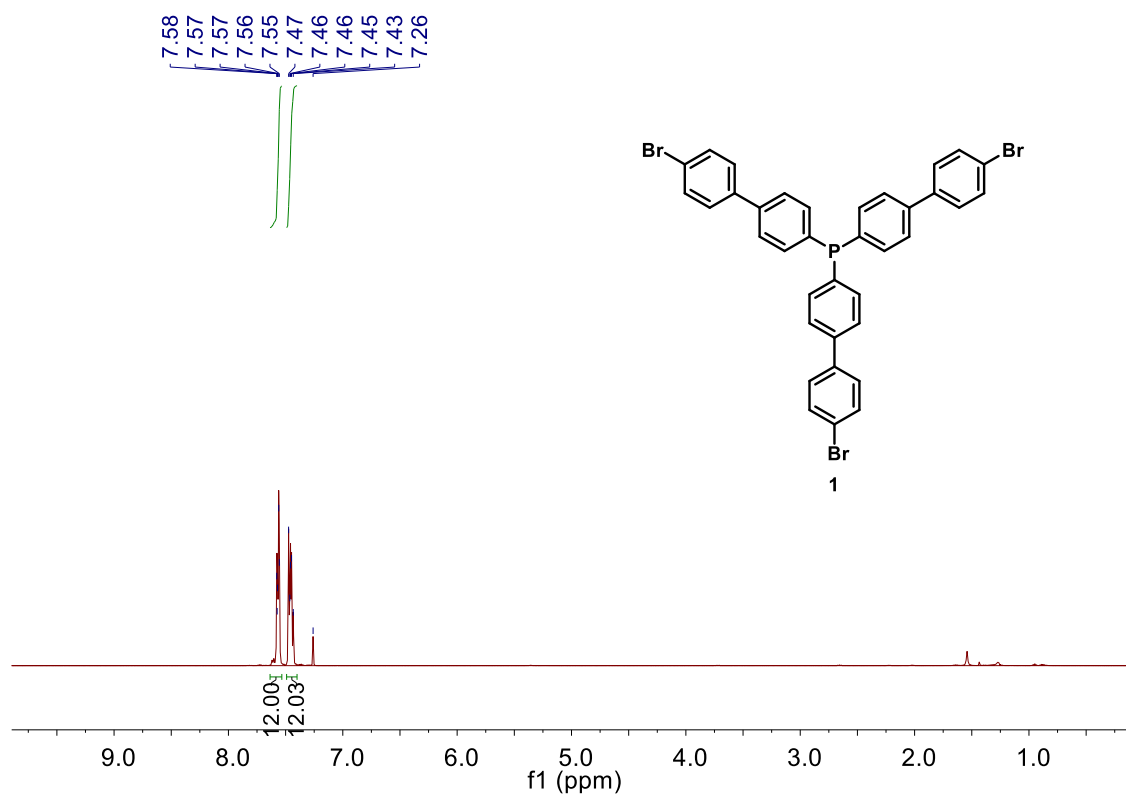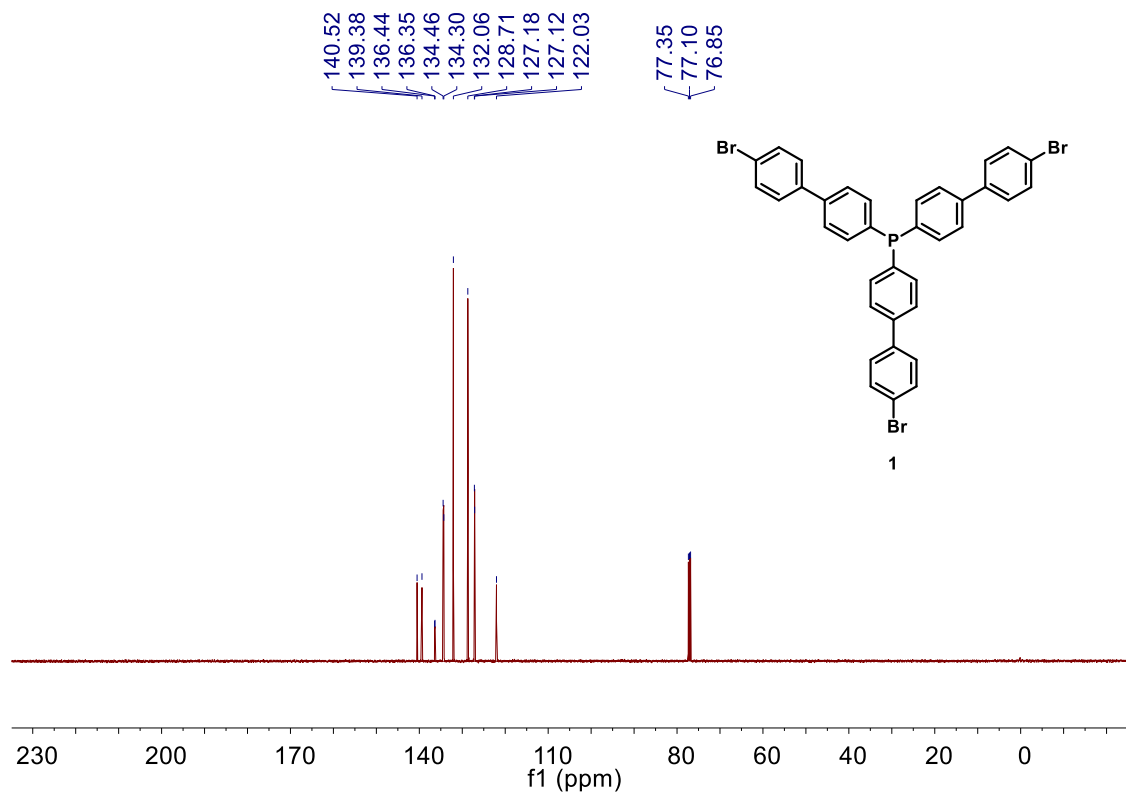

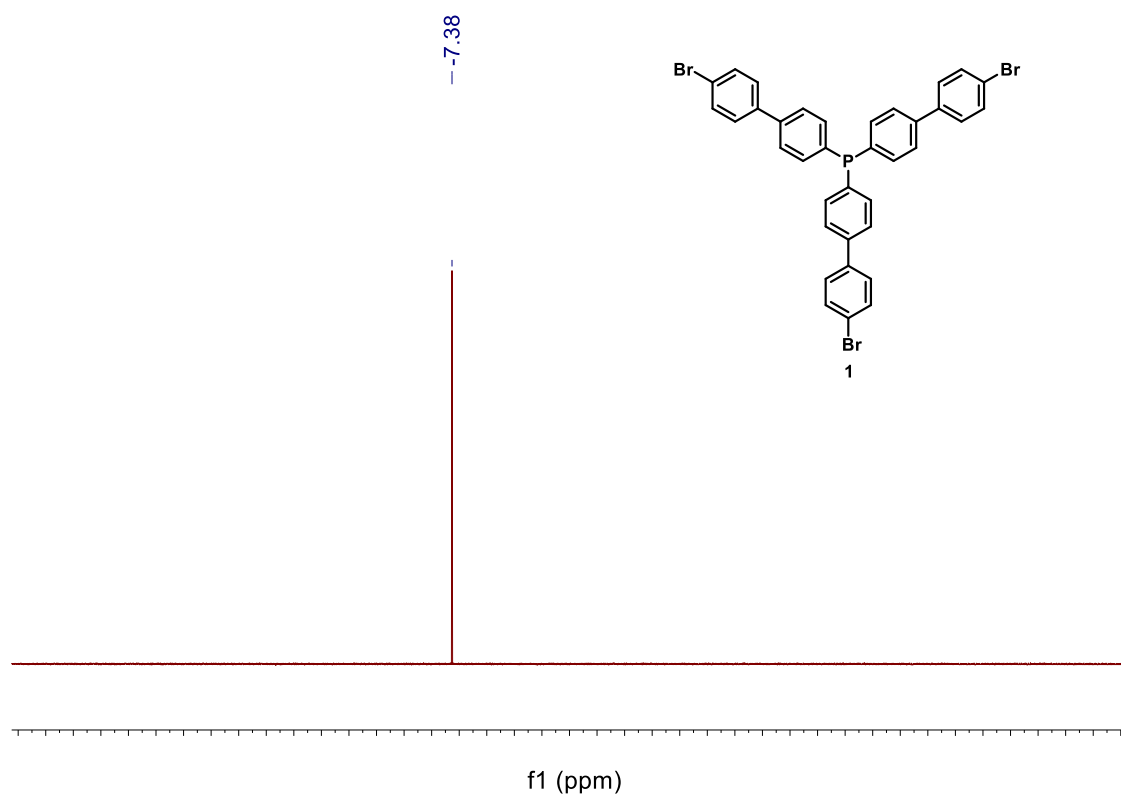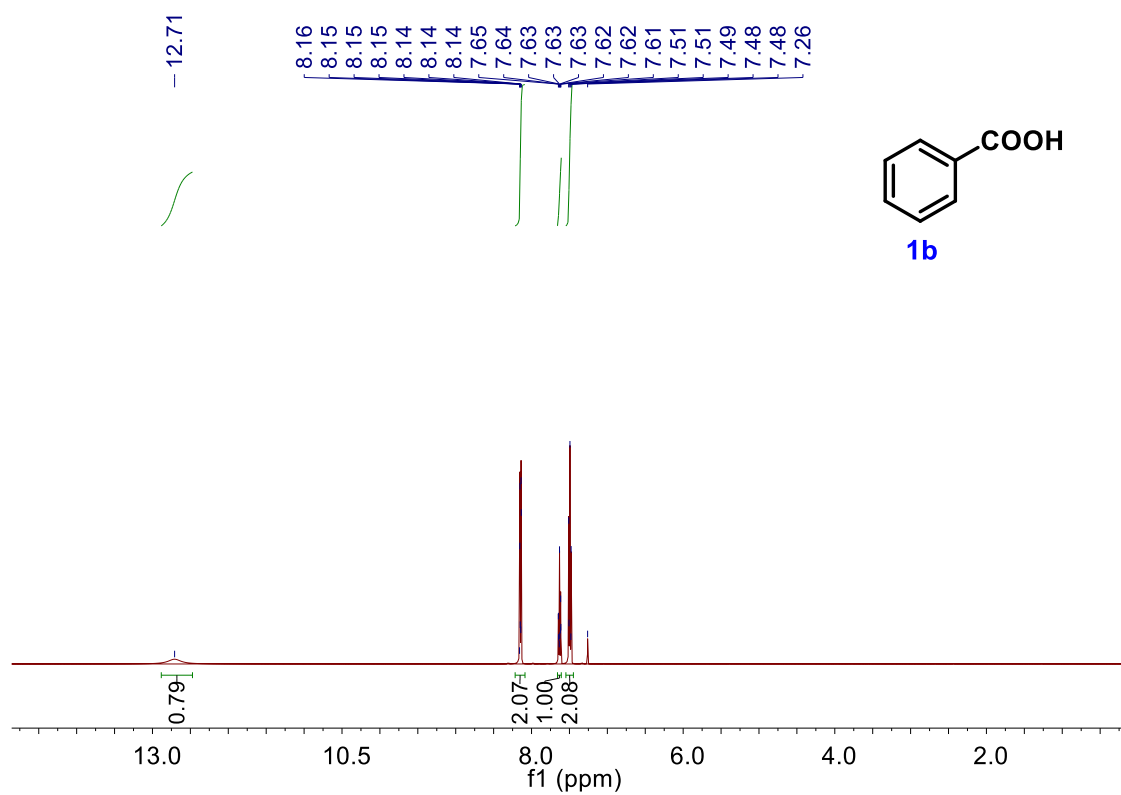

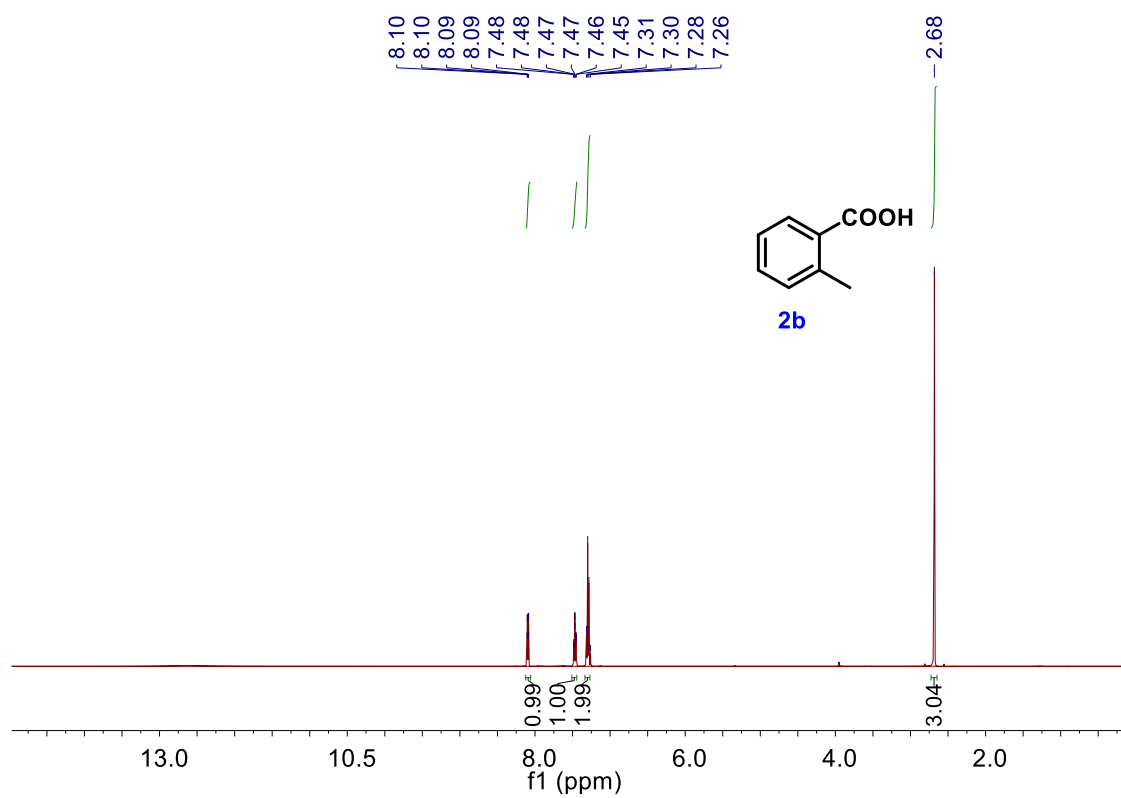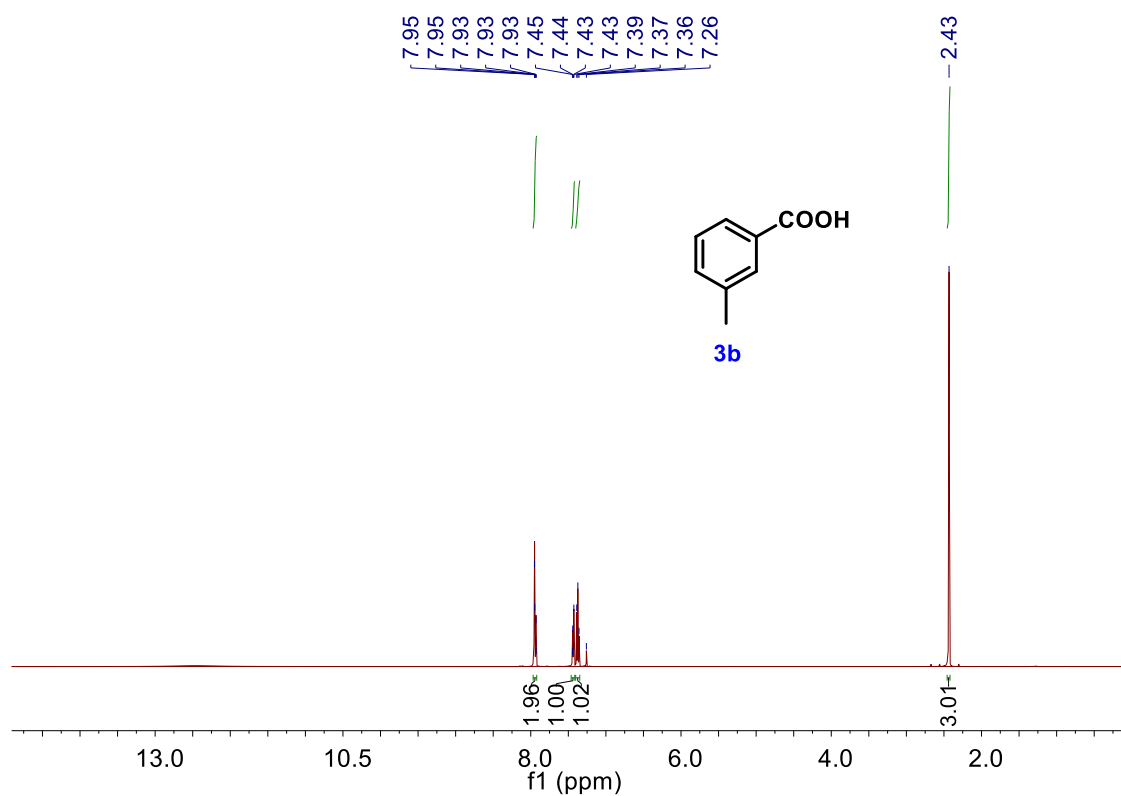

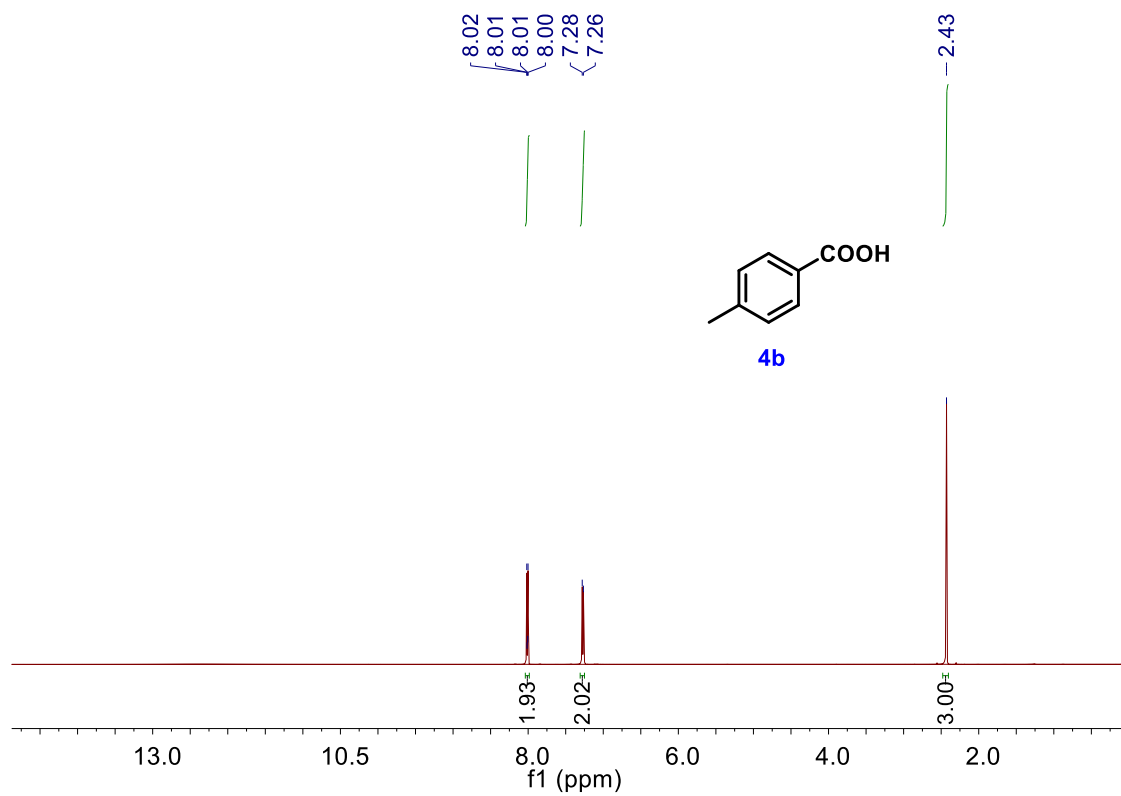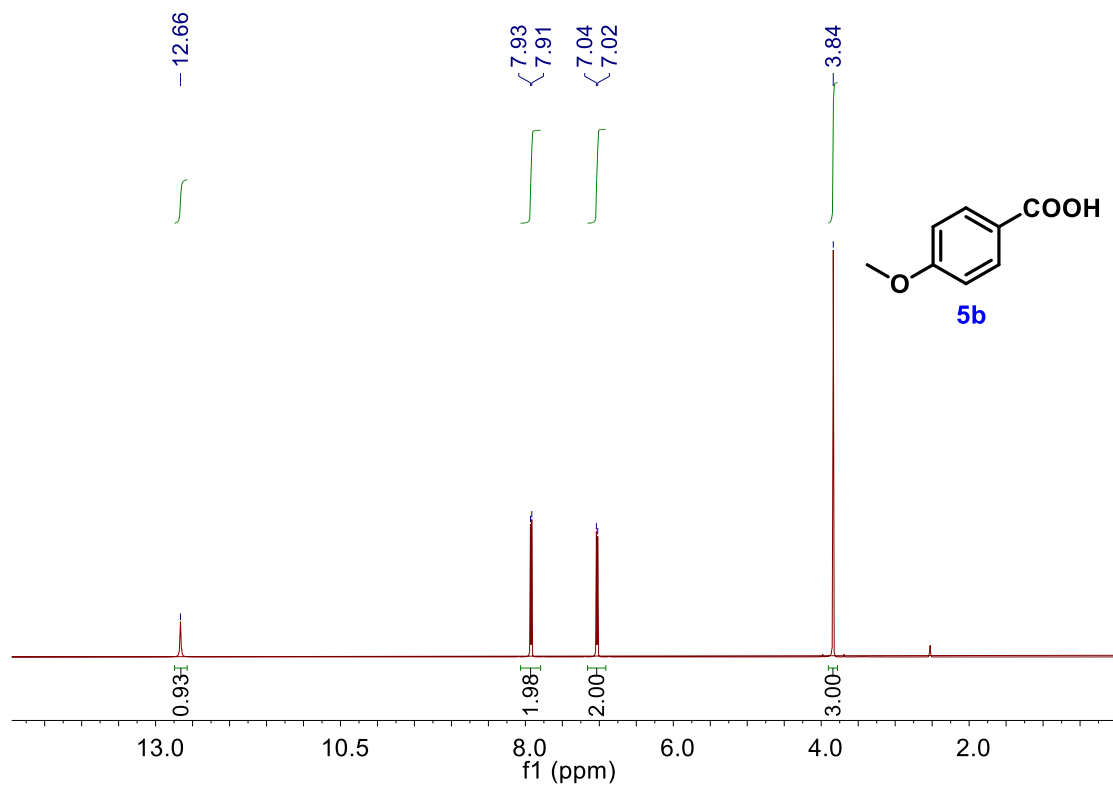

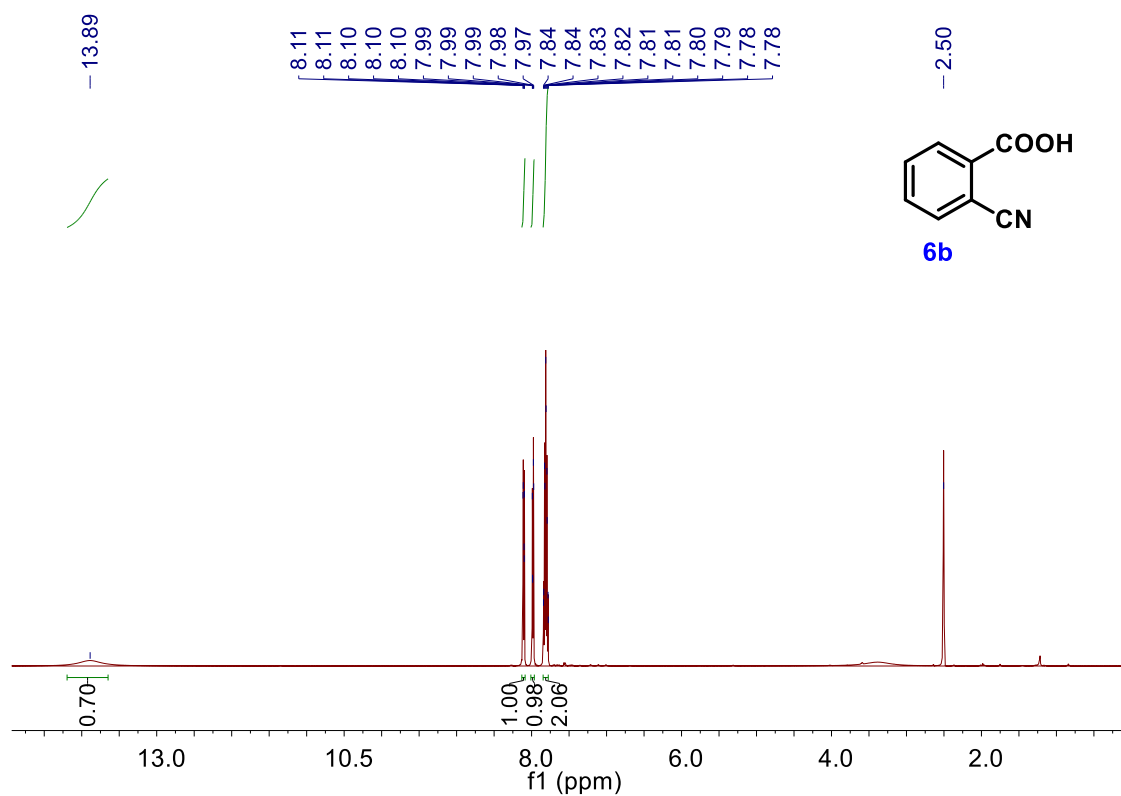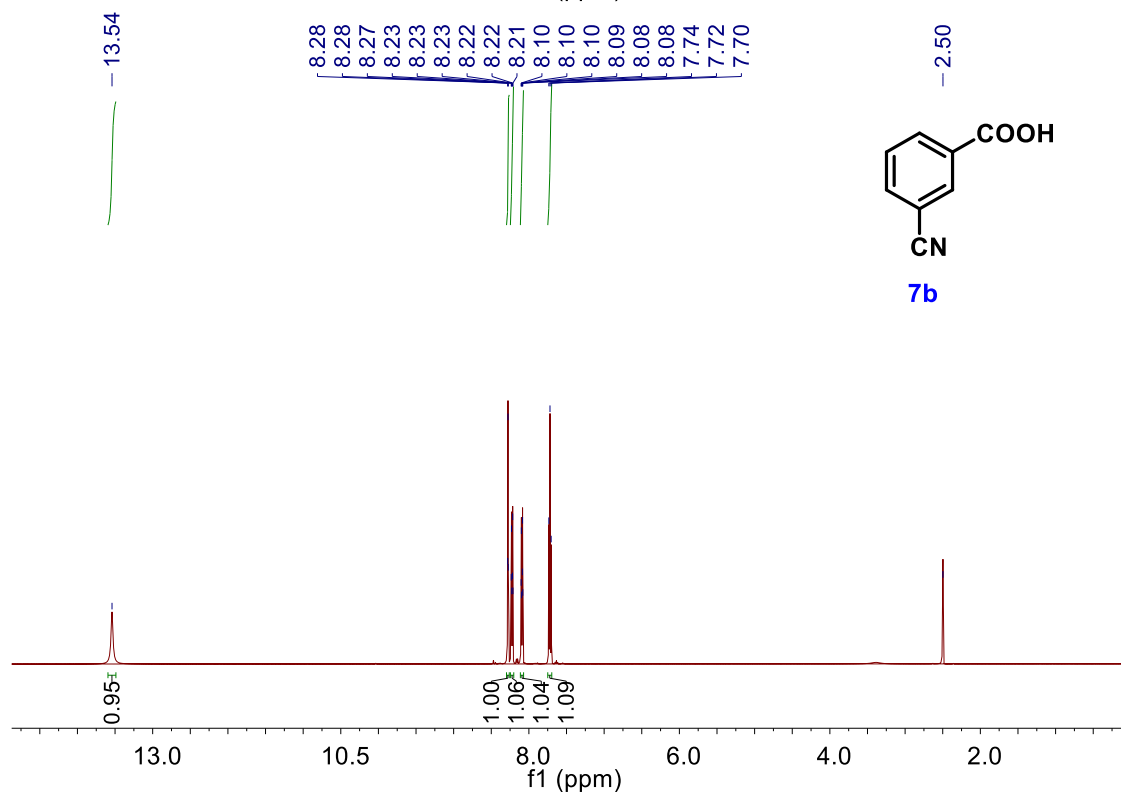

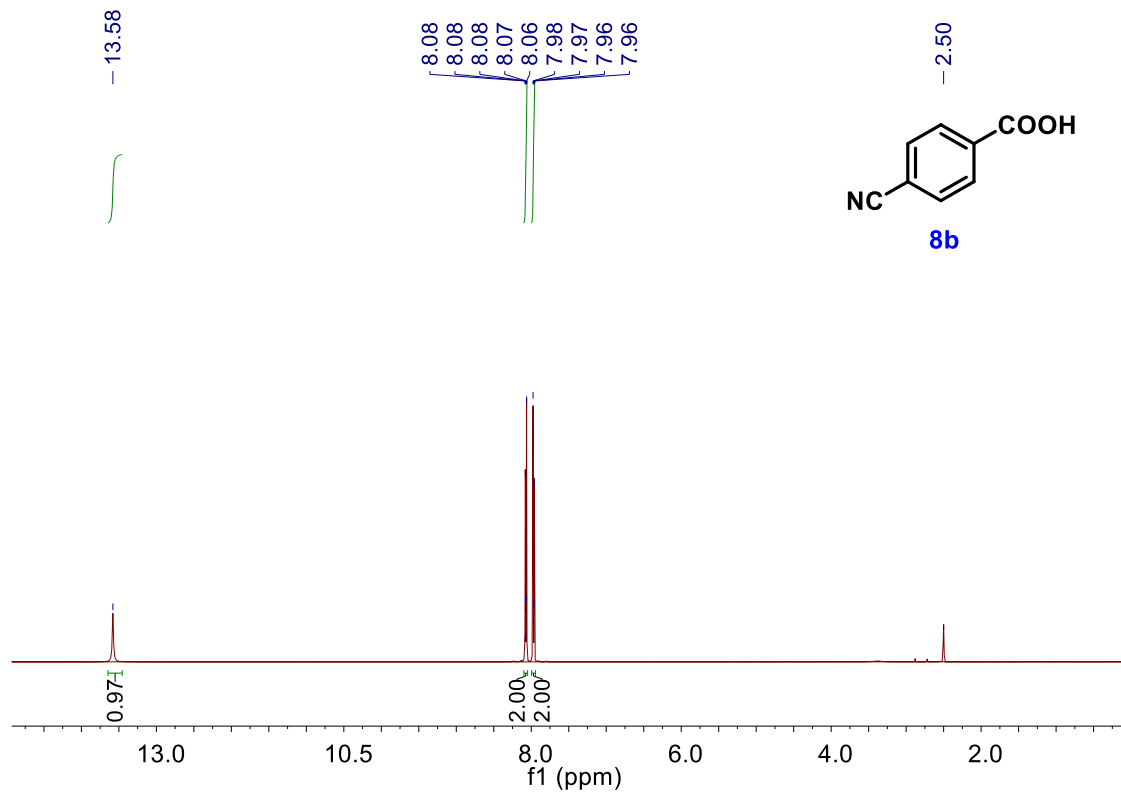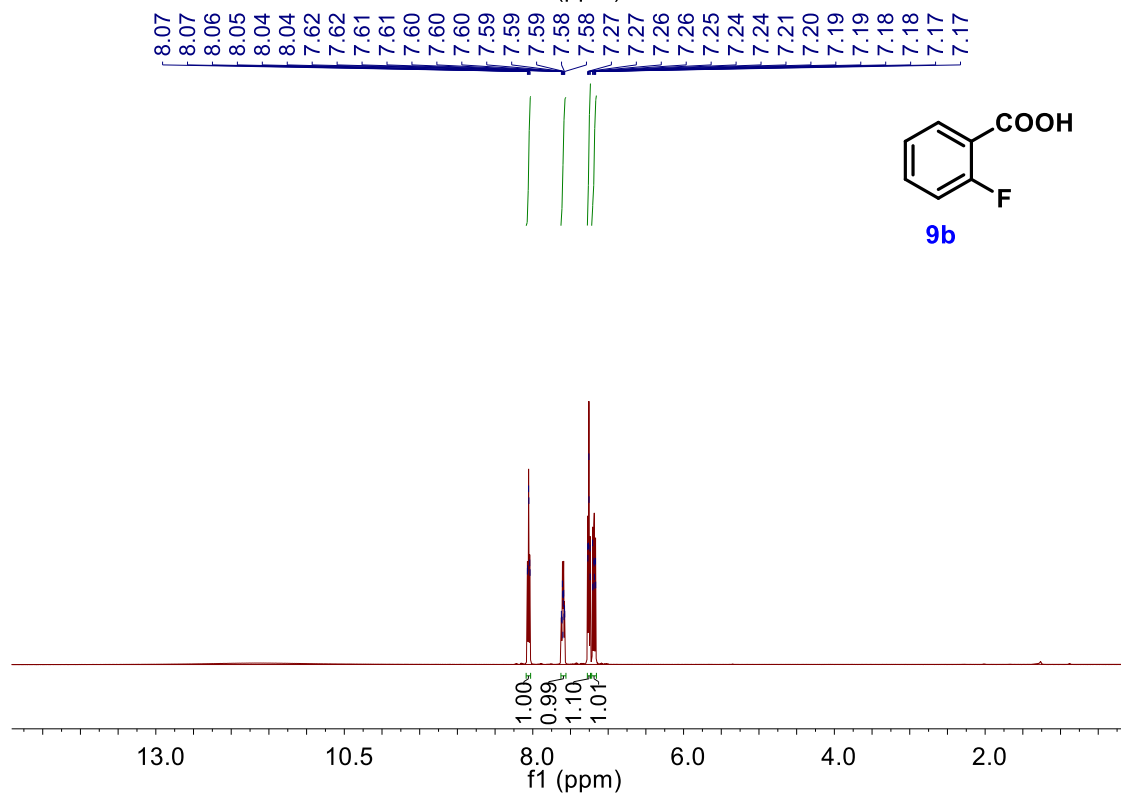

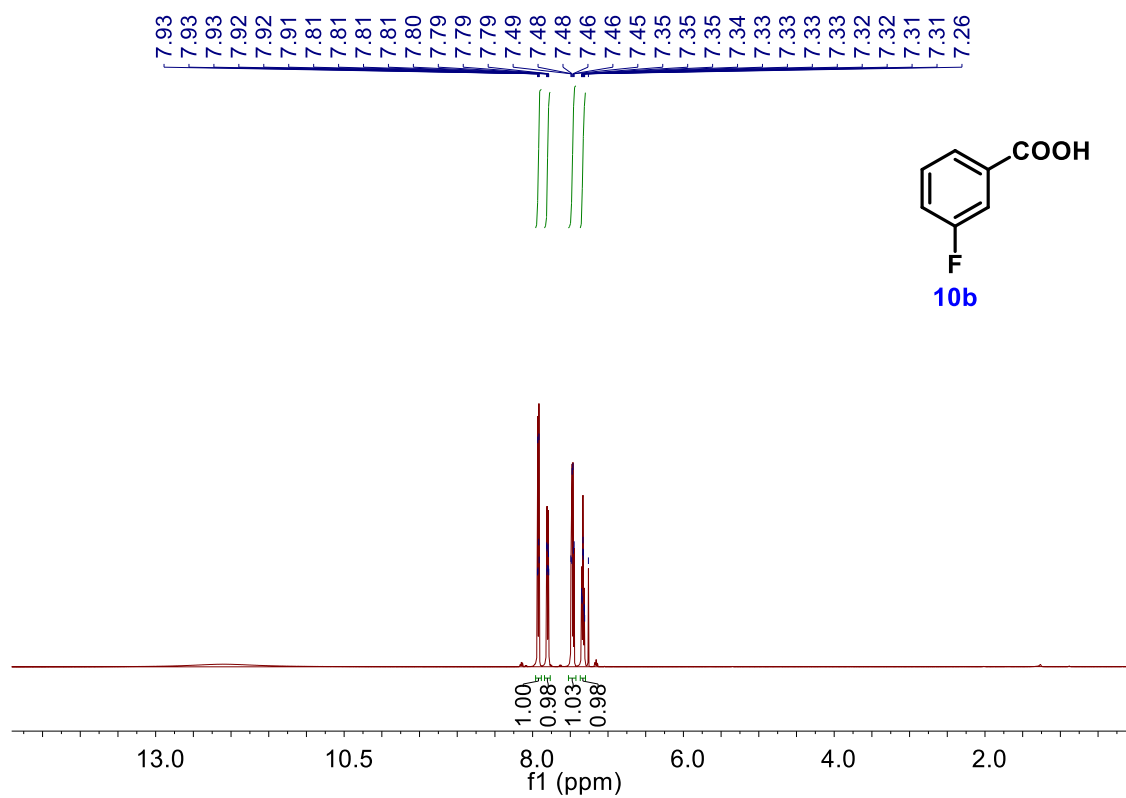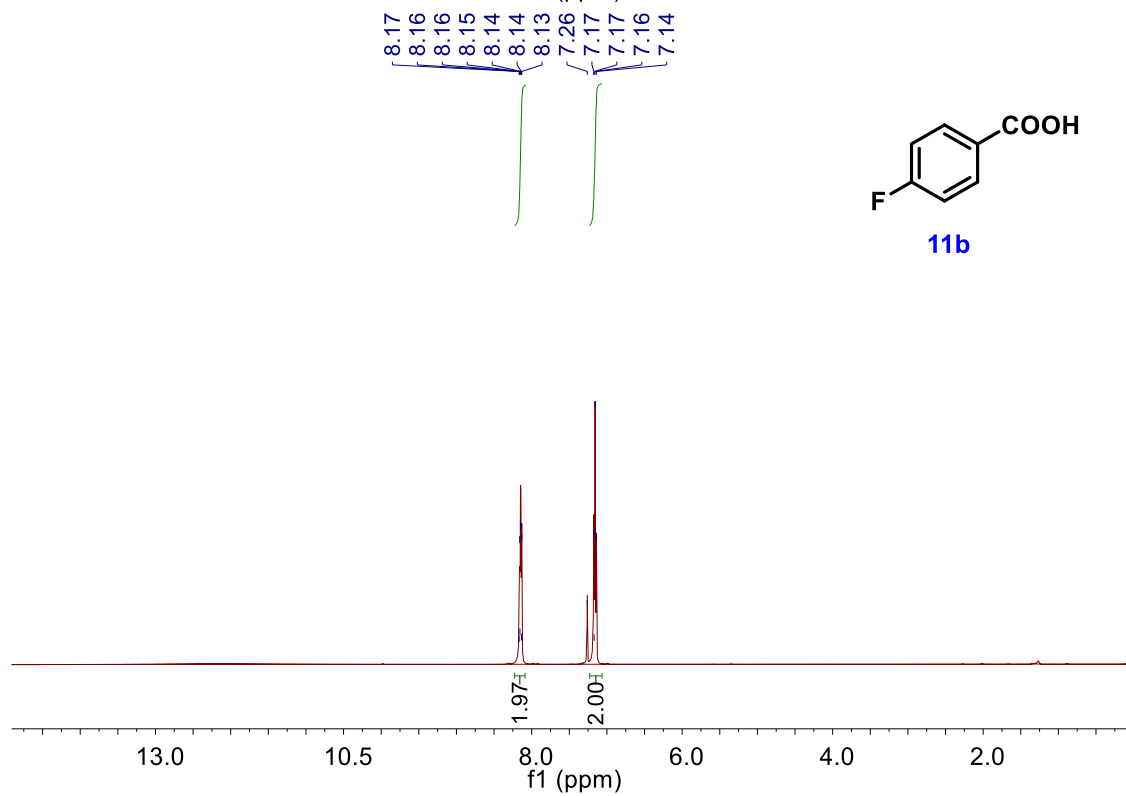

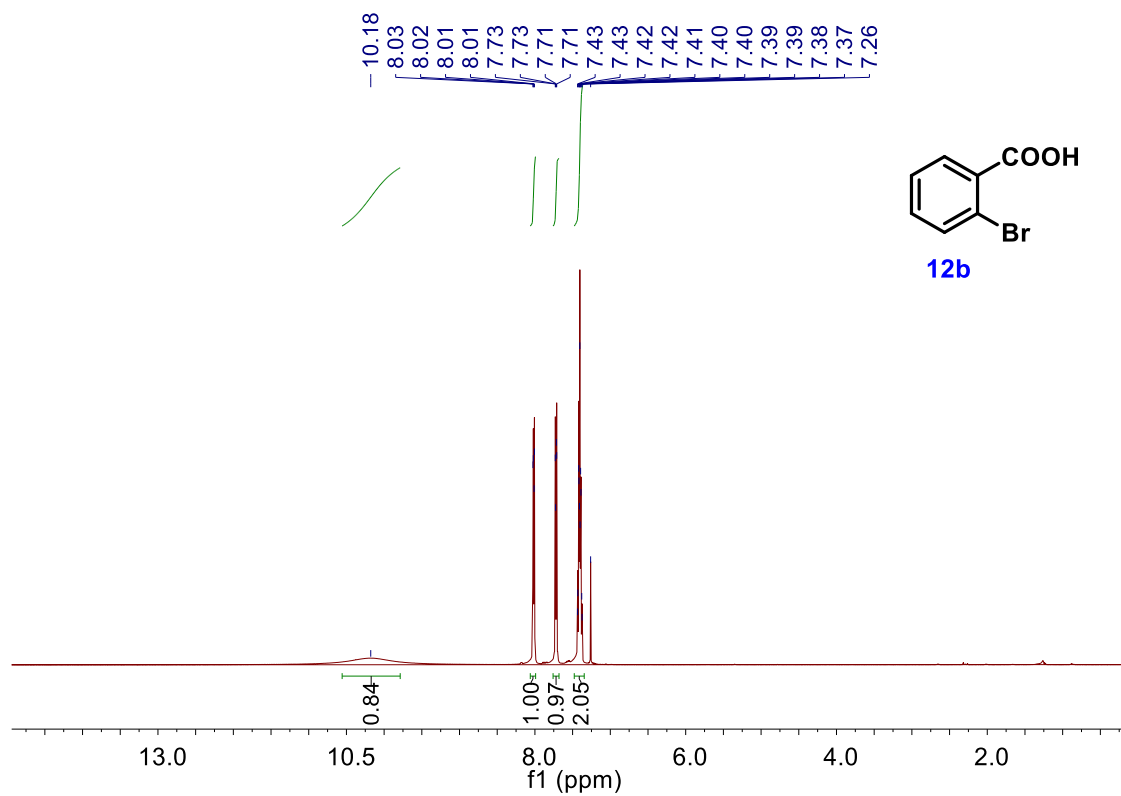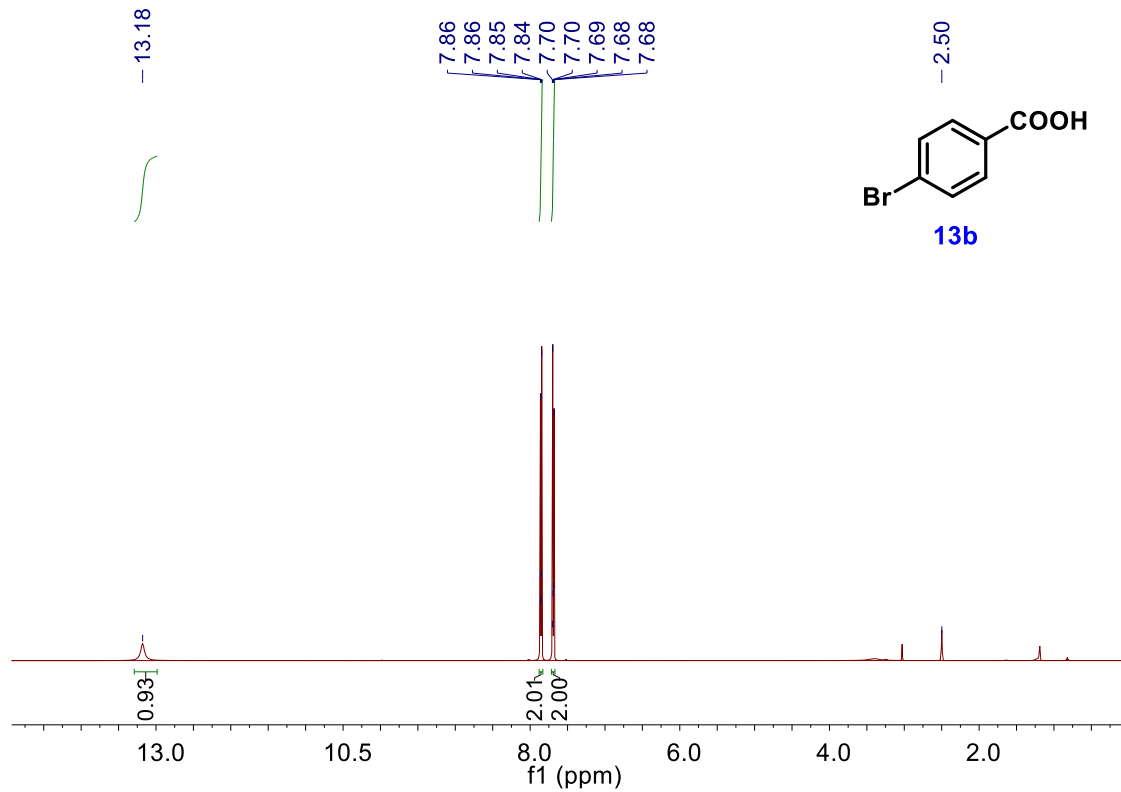

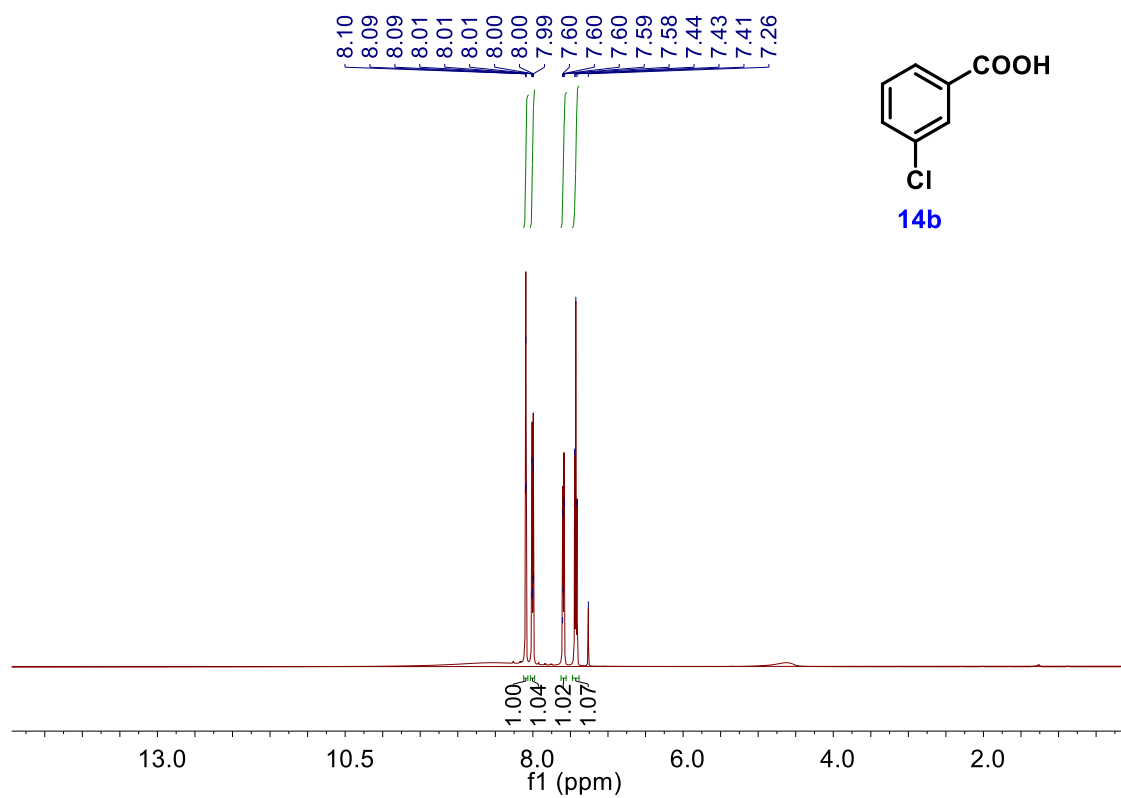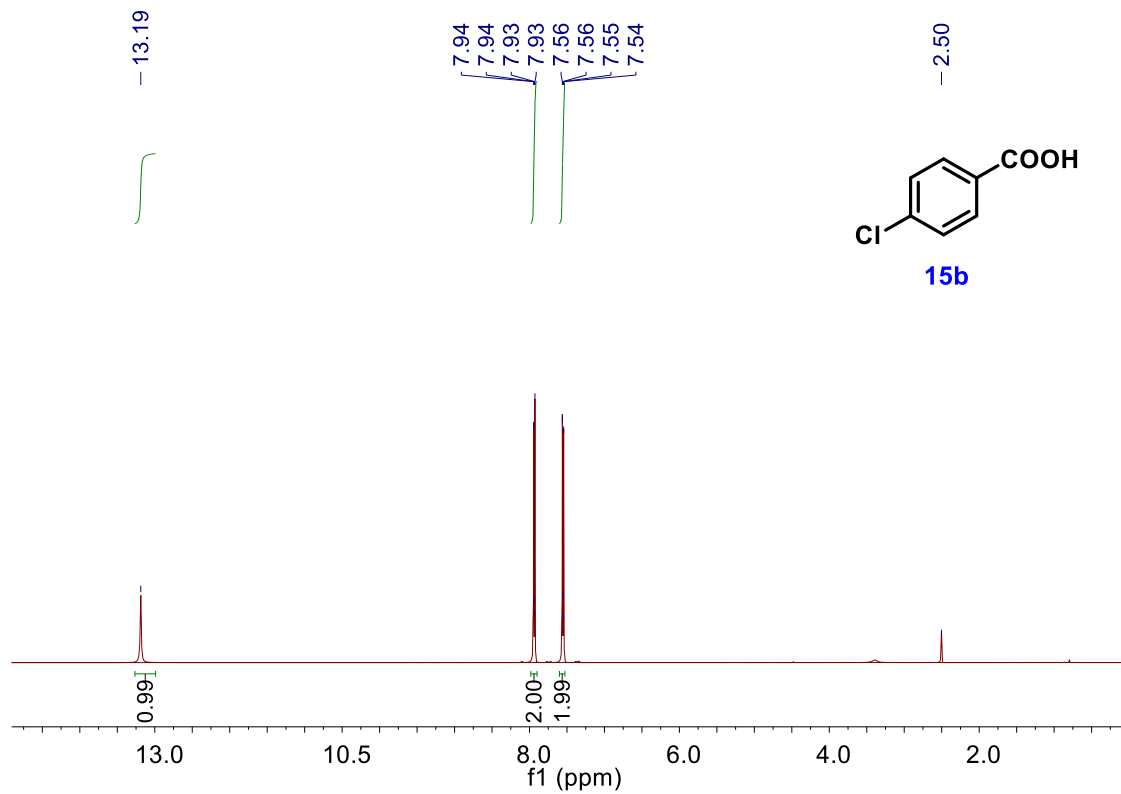

Supplement: s1 [file s1 › catalysts-2566915-supplementary.pdf]
