# Supplementary material for: Highly Efficient and Selective Oxidation of Benzyl Alcohol by WO42− Catalyst Immobilized by a Phosphonium-Containing Porous Aromatic Framework
Source: MDPI journal article supplement (doi:10.3390/catal13091309), 2023-09-20
Supplement: s1 [file s1]

Archive with 1 entries (1 files):
- catalysts-2566915-supplementary.pdf
